# Supplementary material
Source: PubMed Central journal article supplement (PMC4189622)
Supplement: am504566v_si_001.pdf [file am504566v_si_001.pdf]

SUPPORTING INFORMATION

# Injectable Dopamine-Modified Poly(ethylene glycol) Nanocomposite Hydrogel with Enhanced Adhesive Property and Bioactivity

*Yuan Liu,<sup>‡a</sup> Hao Meng,<sup>‡a</sup> Shari Konst,<sup>b</sup> Ryan Sarmiento,<sup>a</sup> Rupak Rajachar,<sup>a</sup> and Bruce P. Lee<sup>\*a</sup>*

AUTHOR ADDRESS.

<sup>‡</sup> Authors contributed equally to this work

<sup>a</sup> Department of Biomedical Engineering, Michigan Technological University, Houghton, MI 49931, USA.

<sup>b</sup> Department of Chemistry, Michigan Technological University, Houghton, MI 49931, USA.

\* To whom correspondence should be addressed: Bruce P. Lee, Ph.D.

Department of Biomedical  
Engineering, Michigan  
Technological University,  
Houghton, MI 49931, USA.  
Phone: (906) 487-3262  
E-mail: [bplee@mtu.edu](mailto:bplee@mtu.edu)

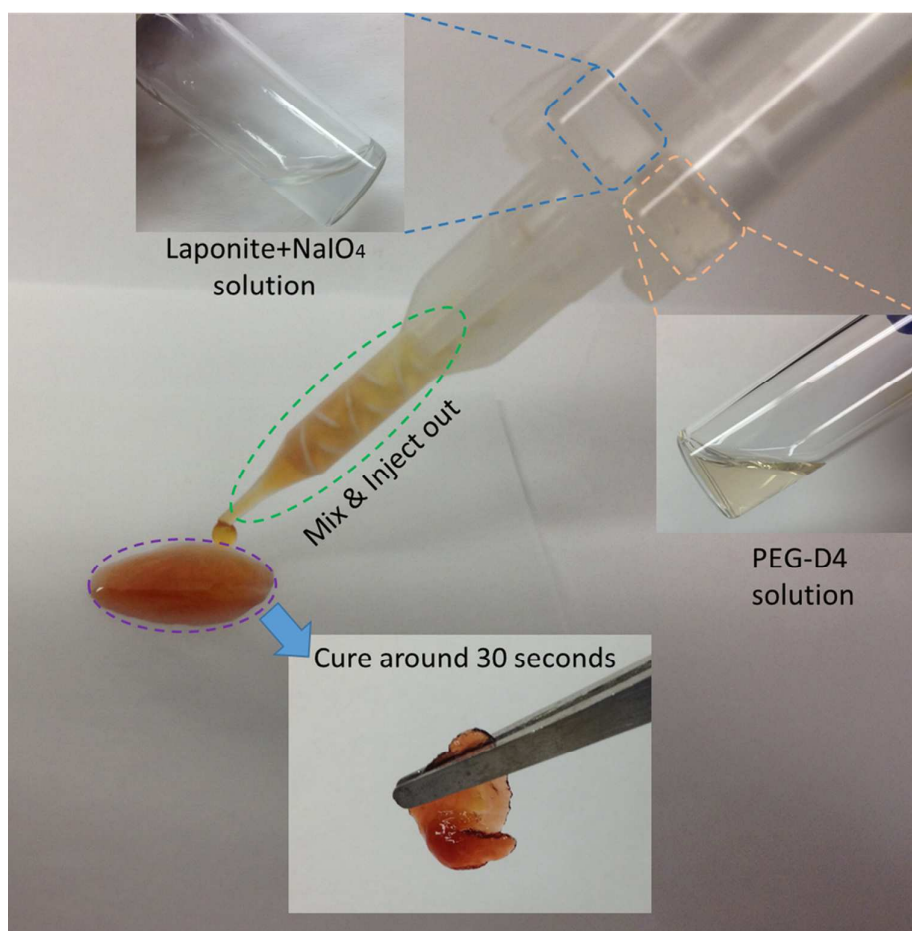

**Figure S1.** Photographs of injecting PEG-D4 nanocomposite hydrogel precursor solutions using a dual-barreled syringe system. The bottom inset showed the cured hydrogel. The final concentration for the nanocomposite hydrogel contains a NaIO<sub>4</sub>:dopamine molar ratio of 0.5 and 2 wt% Laponite.

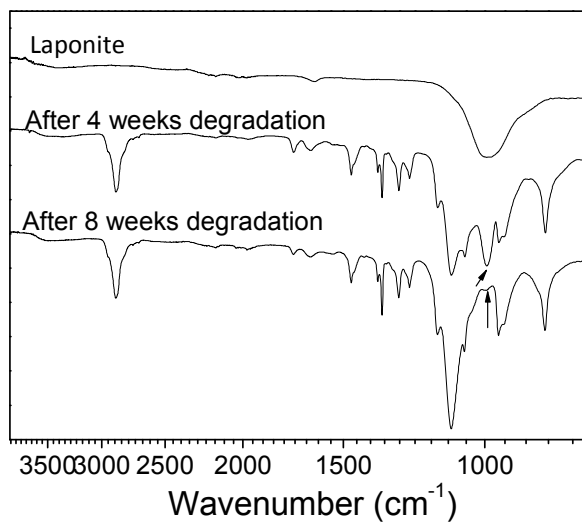

**Figure S2.** FTIR spectra of Laponite, PEG-D4 with 2 wt% Laponite hydrogel after 4 and 8 weeks of degradation. The arrows indicate the Si-O-Si peak in the nanocomposite hydrogel.

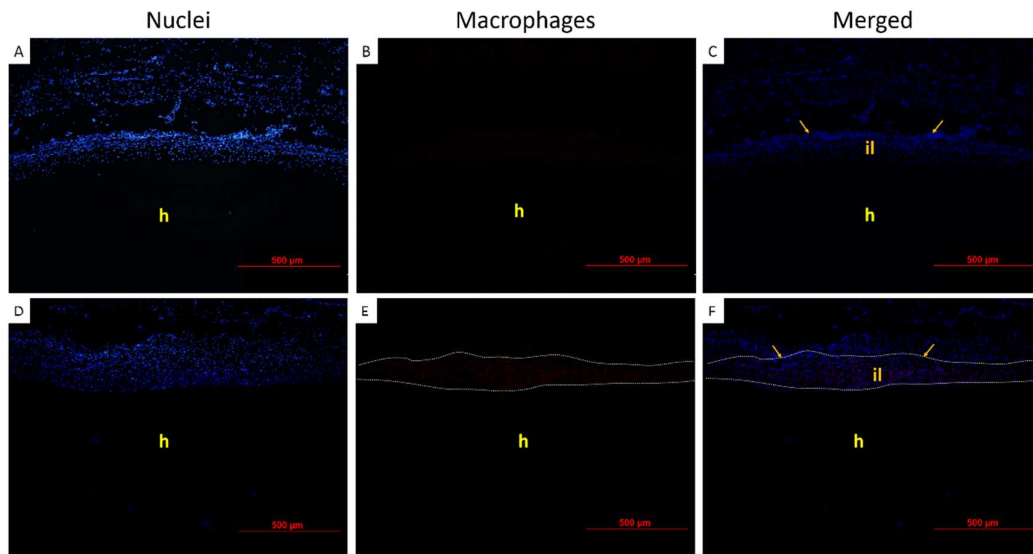

**Figure S3.** Immunohistochemical staining images of PEG-D4 hydrogels with 0wt% (A, B, C) and 2 wt% (D, E, F) Laponite and surrounding tissues after 4 weeks of subcutaneous implantation. Cell nuclei were stained by DAPI (blue), and macrophages were stained by marker CD68 (red). “h”: hydrogel; “il”: infiltration layer; arrows: interface between hydrogel and tissue. Panels E and F contain faint red spots enclosed within the white dashed lines, corresponding to the presence of macrophages. No macrophage was detected for Laponite-free samples (B and C).

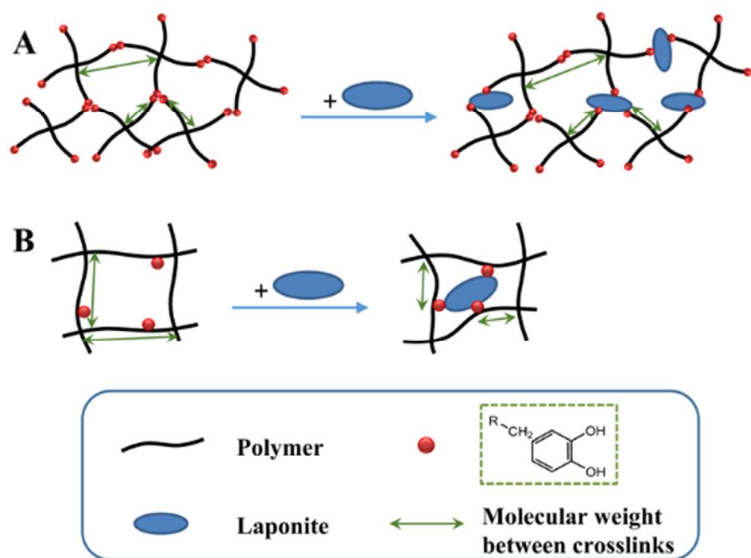

**Scheme S1.** Schematic representation of how the network structure change with the introduction of Laponite. For PEG-D4, crosslinking (i.e., polymerization of dopamine or dopamine-Laponite interaction) occurs at the terminal dopamine moiety and no new crosslinking points are made with the addition of Laponite, resulting in minimal change to the molecular weight between crosslinks (**A**). This is different when compared to a network where dopamine is present as a dangling functional group on the polymer chain and the addition of Laponite forms new crosslinking points, which drastically alter the molecular weight between crosslinks (**B**).
